# Supplementary material
Source: PubMed Central journal article supplement (PMC8804728)
Supplement: sj-pdf-1-car-10.1177_19476035211043202.pdf [file sj-pdf-1-car-10.1177_19476035211043202.pdf]

|                                                     | Week-1              |                     |              | Week-2                    |                           |                  | Week-6                    |                           |              | Week-10                    |                              |                  |
|-----------------------------------------------------|---------------------|---------------------|--------------|---------------------------|---------------------------|------------------|---------------------------|---------------------------|--------------|----------------------------|------------------------------|------------------|
|                                                     | TBP1901             | Saline              | P-value      | TBP1901                   | Saline                    | P-value          | TBP1901                   | Saline                    | P-value      | TBP1901                    | Saline                       | P-value          |
| Tibia of tibiofemoral joint                         |                     |                     |              |                           |                           |                  |                           |                           |              |                            |                              |                  |
| Inflammation score (Median, IQR)                    | <b>4.00, 0.75</b>   | <b>5.00, 0.75</b>   | <b>0.007</b> | <b>3.50, 1.00</b>         | <b>5.50, 1.00</b>         | <b>&lt;0.001</b> | 2.00, 1.00                | 2.50, 1.00                | 1.000        | 2.00, 0.00                 | 2.00, 1.00                   | 0.200            |
| OARSI score (Median, IQR)                           | 8.50, 8.00          | 10.50, 10.50        | 0.715        | 5.00, 11.00               | 8.50, 8.25                | 0.857            | 12.00, 3.00               | 10.50, 3.75               | 0.582        | <b>9.00, 5.25</b>          | <b>16.00, 6.00</b>           | <b>0.014</b>     |
| Modified Mankin score (Median, IQR)                 | 5.00, 4.75          | 7.00, 5.00          | 0.156        | 5.00, 2.75                | 5.00, 1.75                | 1.000            | 6.00,0.75                 | 5.50, 1.75                | 0.608        | <b>4.00, 2.00</b>          | <b>6.00, 0.00</b>            | <b>&lt;0.001</b> |
| Minimum intensity of typeI Collagen (Mean, 95%CI)   | 16.63, 10.52-22.73  | 19.25, 14.10-24.40  | 0.451        | 38.38, 15.49-61.26        | 27.50, 12.29-42.71        | 0.368            | 24.00, 14.07-33.93        | 16.00, 4.38-27.62         | 0.237        | 32.88, 20.53-45.22         | 28.50, 16.79-40.21           | 0.553            |
| Mean intensity of typeII Collagen (Mean, 95%CI)     | 99.04, 94.12-103.95 | 97.97, 91.02-104.92 | 0.772        | 107.42, 97.34-117.51      | 106.08, 101.33-110.83     | 0.782            | 101.46, 93.32-109.60      | 94.46, 85.29-103.63       | 0.199        | <b>97.53, 93.17-101.88</b> | <b>105.72, 102.85-108.60</b> | <b>0.003</b>     |
| Percent of IL1β positive cells (Mean, 95%CI, %)     | 44.07, 26.33-61.81  | 50.13, 43.20-57.06  | 0.471        | 59.88, 44.62-75.14        | 58.98, 40.67-77.28        | 0.930            | 71.07, 54.43-87.70        | 75.49, 62.28-88.70        | 0.630        | 80.65, 75.87-85.43         | 80.62, 71.38-89.86           | 0.994            |
| Percent of IL6 positive cells (Mean, 95%CI, %)      | 35.12, 17.85-52.40  | 40.58, 32.29-48.87  | 0.504        | 44.11, 35.04-53.18        | 43.06, 29.84-56.29        | 0.880            | 67.79, 54.83-80.75        | 76.09, 65.80-86.38        | 0.257        | 77.34, 68.17-86.51         | 74.96, 61.89-88.04           | 0.731            |
| Percent of TNFα positive cells (Mean, 95%CI, %)     | 43.83, 30.84-56.81  | 48.09, 41.53-54.66  | 0.516        | 47.68, 36.77-58.59        | 48.05, 39.07-57.04        | 0.951            | <b>65.98, 56.37-75.59</b> | <b>79.96, 71.83-88.09</b> | <b>0.020</b> | 76.65, 65.78-87.53         | 80.30, 66.84-93.76           | 0.626            |
| SB plate thickness (Mean, 95%CI, mm)                | 0.54, 0.49-0.59     | 0.56, 0.50-0.62     | 0.539        | <b>0.55, 0.45-0.65</b>    | <b>0.36, 0.28-0.43</b>    | <b>0.002</b>     | <b>1.01, 0.88-1.14</b>    | <b>0.79, 0.62-0.96</b>    | <b>0.029</b> | <b>0.54, 0.41-0.68</b>     | <b>0.86, 0.72-0.99</b>       | <b>0.002</b>     |
| Numer of SB plate perforations (Mean, 95%CI)        | 0.13, -0.17-0.42    | 0.00, 0.00-0.00     | 0.351        | 0.63, -0.14-1.39          | 1.63, -0.90-4.15          | 0.396            | 4.00, 2.59-5.41           | 2.75, 0.57-4.93           | 0.277        | <b>0.88, -0.07-1.82</b>    | <b>5.00, 3.59-6.41</b>       | <b>&lt;0.001</b> |
| Diameter of SB plate perforations (Mean, 95%CI, mm) | 0.04, -0.06-0.15    | 0.00, 0.00-0.00     | 0.351        | 0.12, -0.02-0.27          | 0.13, -0.09-0.34          | 0.976            | 0.51, 0.35-0.68           | 0.43, 0.23-0.63           | 0.453        | <b>0.16, -0.02-0.36</b>    | <b>0.60, 0.44-0.77</b>       | <b>0.001</b>     |
| BV / TV × 100 (Mean, 95%CI, %)                      | 64.36, 61.45-67.27  | 64.24, 60.13-68.34  | 0.956        | <b>65.82, 62.25-69.39</b> | <b>71.12, 68.65-73.58</b> | <b>0.013</b>     | <b>74.06, 72.51-75.60</b> | <b>69.03, 66.12-71.94</b> | <b>0.004</b> | 74.72, 71.40-78.03         | 74.67, 71.72-77.62           | 0.980            |
| Oteophyte Volume (Mean, 95%CI, mm³)                 |                     |                     |              |                           |                           |                  | 0.94, 0.70-1.18           | 1.19, 0.87-1.50           | 0.164        | <b>1.16, 0.89-1.43</b>     | <b>2.06, 1.83-2.29</b>       | <b>&lt;0.001</b> |
| Patella of patellofemoral joint                     |                     |                     |              |                           |                           |                  |                           |                           |              |                            |                              |                  |
| OARSI score (Median, IQR)                           | 2.00, 4.50          | 5.00, 4.75          | 0.060        | 3.00, 4.00                | 2.50, 4.00                | 0.705            | 5.00, 2.00                | 4.00, 3.00                | 0.257        | <b>1.00, 3.75</b>          | <b>8.00, 3.50</b>            | <b>0.008</b>     |
| Modified Mankin score (Median, IQR)                 | <b>1.50, 1.00</b>   | <b>3.00, 1.00</b>   | <b>0.025</b> | 3.00, 1.00                | 2.00, 1.00                | 0.337            | 2.00, 1.00                | 1.00, 0.00                | 0.087        | 3.00, 1.00                 | 3.00, 0.00                   | 0.518            |
| Minimum intensity of typeI Collagen (Mean, 95%CI)   | 58.75, 45.81-71.69  | 52.25, 34.29-70.21  | 0.500        | 72.13, 52.97-91.28        | 50.13, 31.00-69.25        | 0.075            | 61.38, 28.68-94.07        | 36.13, 29.20-43.05        | 0.114        | 68.63, 57.16-80.09         | 52.75, 34.09-71.40           | 0.113            |
| Mean intensity of typeII Collagen (Mean, 95%CI)     | 96.53, 89.26-103.80 | 95.51, 87.02-104.00 | 0.832        | 100.62, 90.33-110.91      | 101.80, 92.76-110.84      | 0.842            | 95.79, 91.74-99.83        | 97.88, 90.58-105.18       | 0.566        | <b>94.82, 90.57-99.08</b>  | <b>101.35, 97.64-105.07</b>  | <b>0.016</b>     |
| Percent of IL1β positive cells (Mean, 95%CI, %)     | 95.43, 92.92-97.93  | 96.80, 95.43-98.18  | 0.280        | 96.66, 94.86-98.47        | 95.86, 93.51-98.21        | 0.533            | <b>98.16, 96.50-99.82</b> | <b>87.75, 82.92-92.59</b> | <b>0.001</b> | 92.44, 87.68-97.21         | 93.63, 87.93-99.33           | 0.711            |
| Percent of IL6 positive cells (Mean, 95%CI, %)      | 89.49, 86.22-92.76  | 90.91, 86.99-94.83  | 0.522        | 92.37, 87.80-96.94        | 91.75, 85.93-97.57        | 0.846            | <b>96.85, 95.15-98.55</b> | <b>87.17, 82.55-91.79</b> | <b>0.001</b> | 85.58, 75.54-95.62         | 88.38, 83.28-93.69           | 0.572            |
| Percent of TNFα positive cells (Mean, 95%CI, %)     | 87.55, 79.26-95.85  | 91.52, 85.19-97.86  | 0.385        | 86.03, 73.32-98.74        | 84.59, 69.31-99.88        | 0.866            | 84.92, 77.38-92.47        | 92.60, 89.32-95.89        | 0.053        | 94.67, 91.29-98.05         | 91.29, 85.70-96.87           | 0.245            |
