# Supplementary material
Source: PubMed Central journal article supplement (PMC8804728)

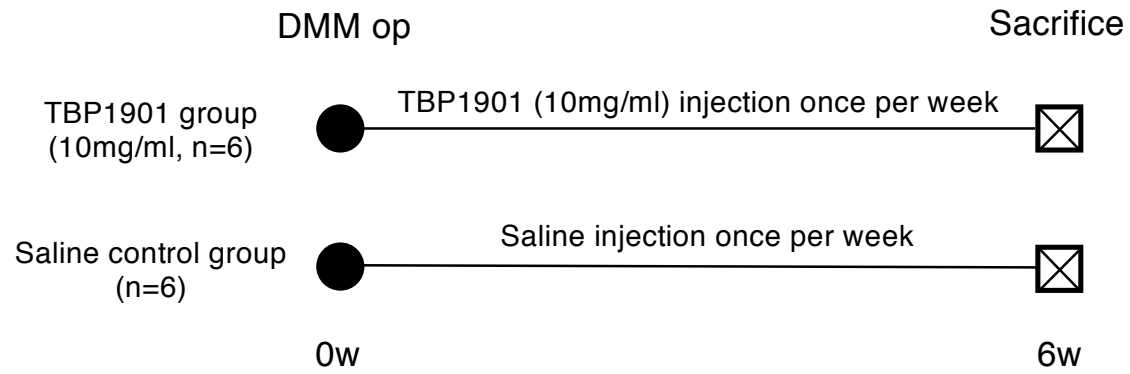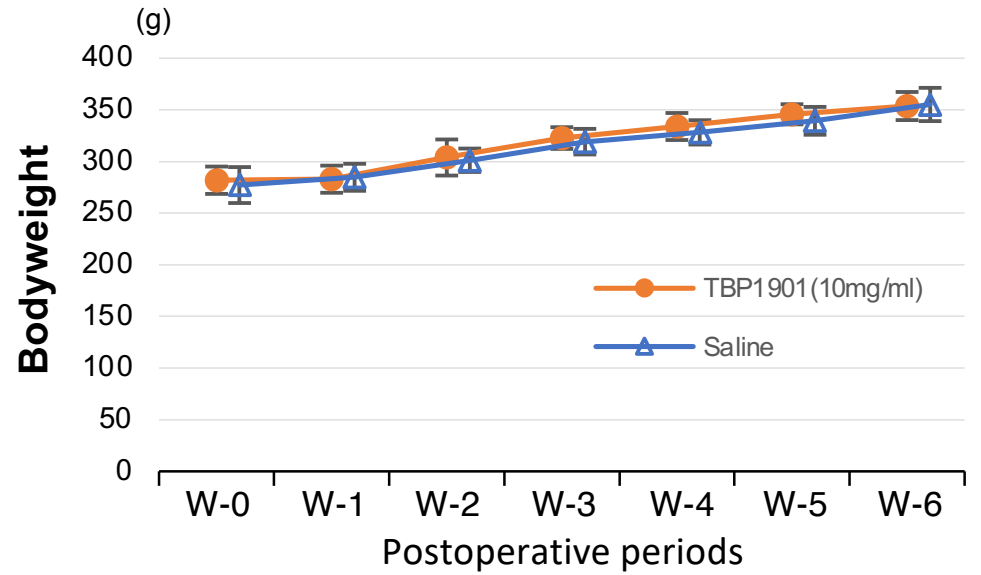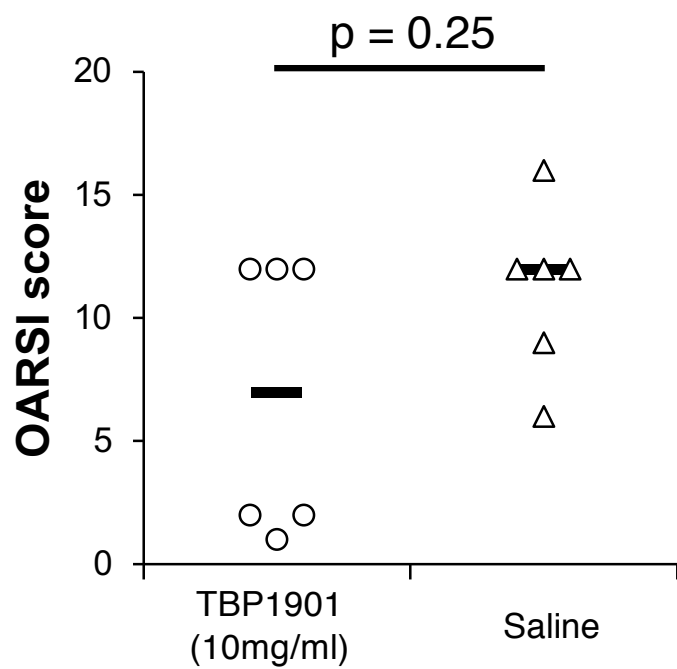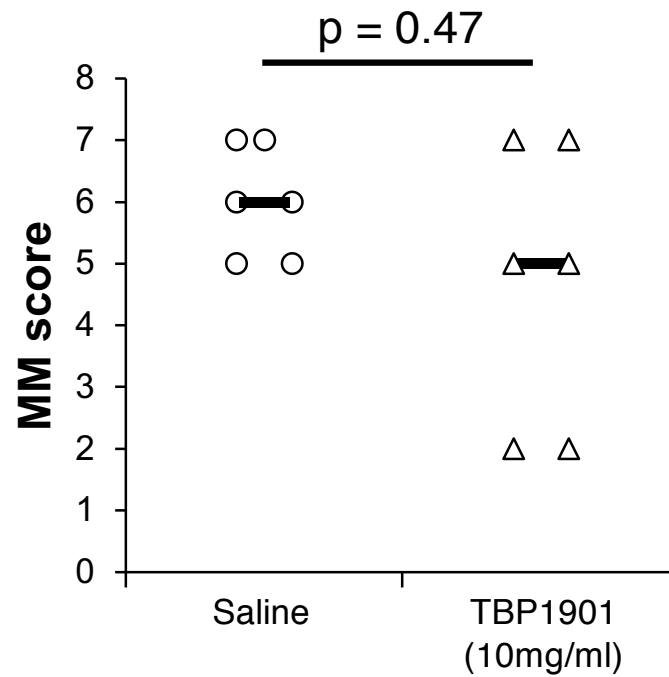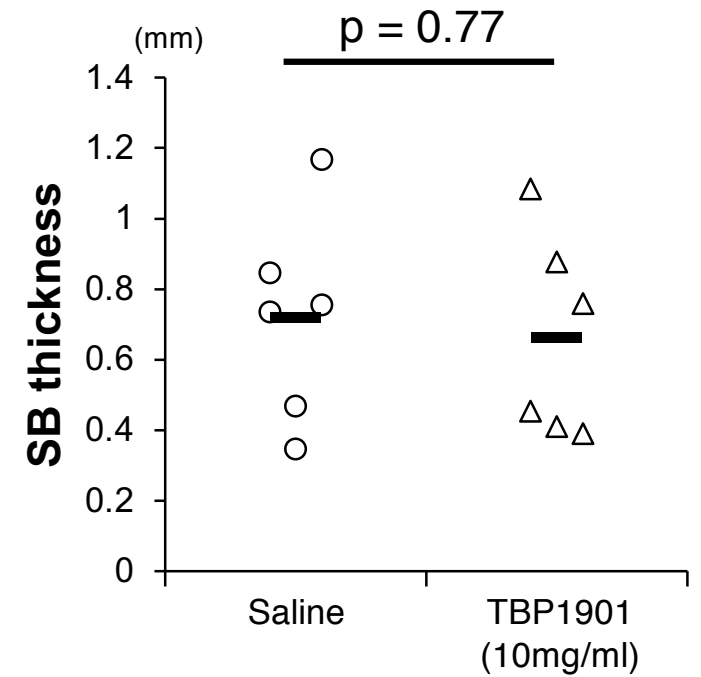

Supplement: sj-pdf-2-car-10.1177_19476035211043202.pdf [file sj-pdf-2-car-10.1177_19476035211043202.pdf]

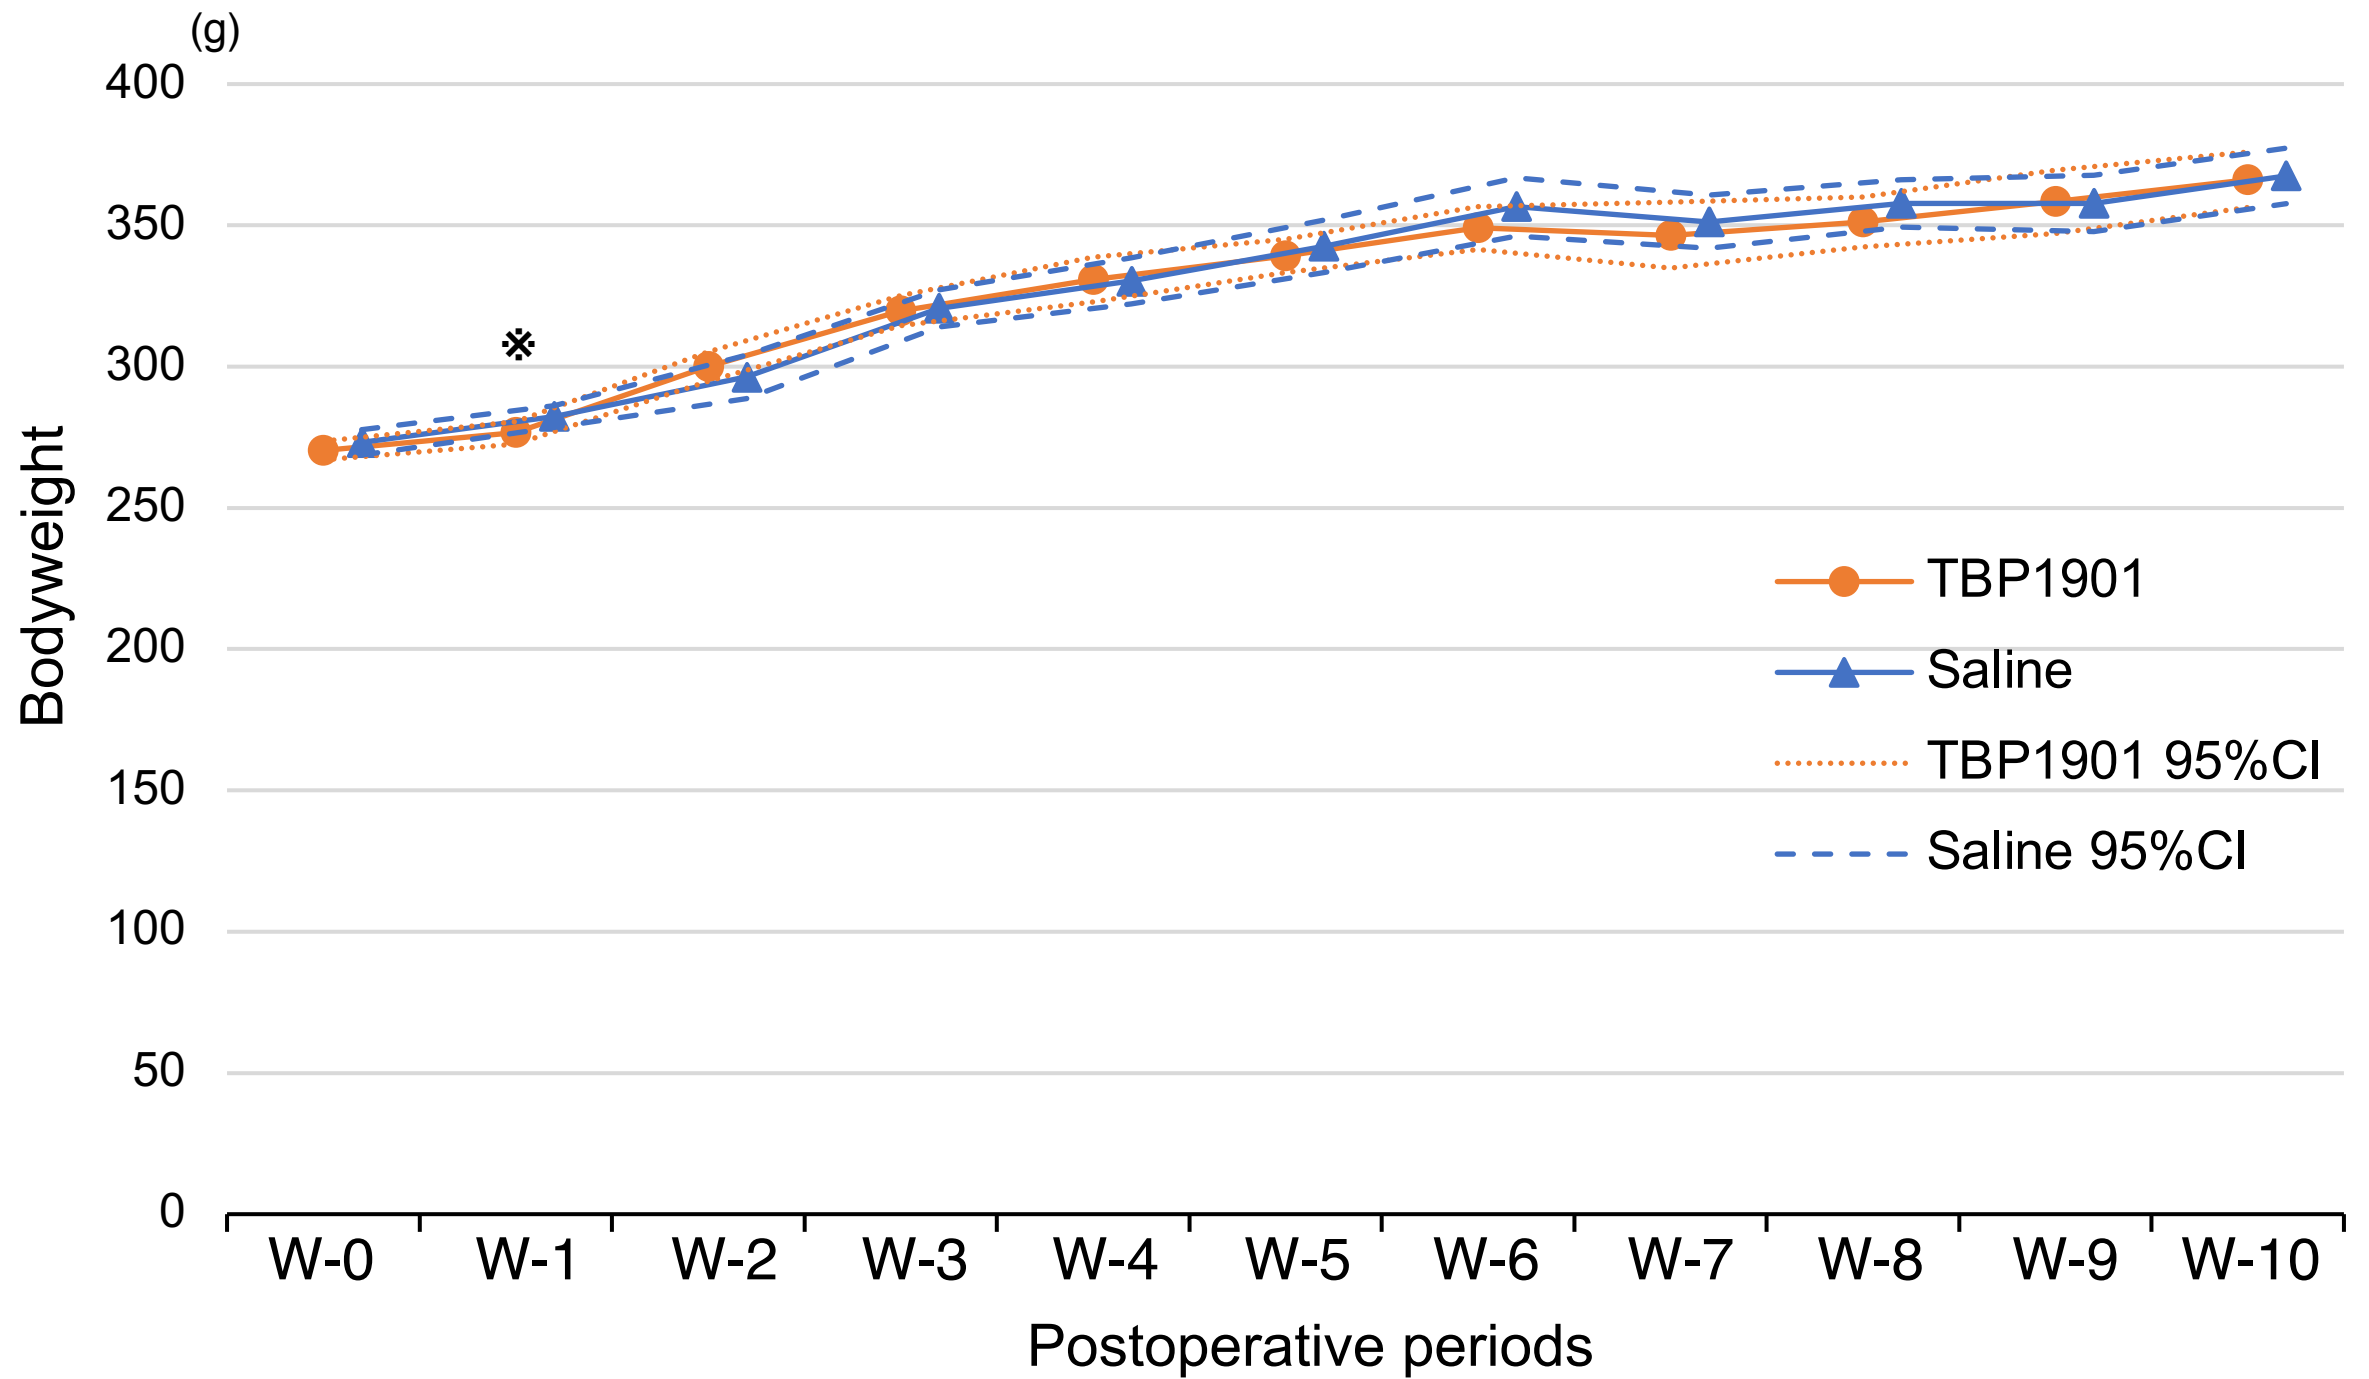

Supplement: sj-pdf-3-car-10.1177_19476035211043202.pdf [file sj-pdf-3-car-10.1177_19476035211043202.pdf]
